# Supplementary material for: Investigation into the Pressure-Driven Extension of the EPANET Hydraulic Simulation Model for Water Distribution Systems
Source: Springer Nature journal article supplement (doi:10.1007/s11269-016-1492-6), 2016-09-28
Supplement: MOESM1 [file 11776490]

## WATER RESOURCES MANAGEMENT

### SUPPLEMENTARY DATA

Investigation into the Pressure-Driven Extension of the EPANET Hydraulic Simulation Model  
for Water Distribution Systems

Alemtsehay G. Seyoum and Tiku T. Tanyimboh \*

Department of Civil and Environmental Engineering, University of Strathclyde Glasgow  
James Weir Building, 75 Montrose Street, Glasgow G1 1XJ, UK

\*Corresponding Author

Seyoum AG and Tanyimboh TT (2016) Investigation into the pressure-driven extension of the EPANET hydraulic simulation model for water distribution systems. *Water Resources Management*, DOI:10.1007/s11269-016-1492-6

#### **APPENDIX: SUPPLEMENTARY DATA**

Additional results are provided here in Figures 6 and 7.

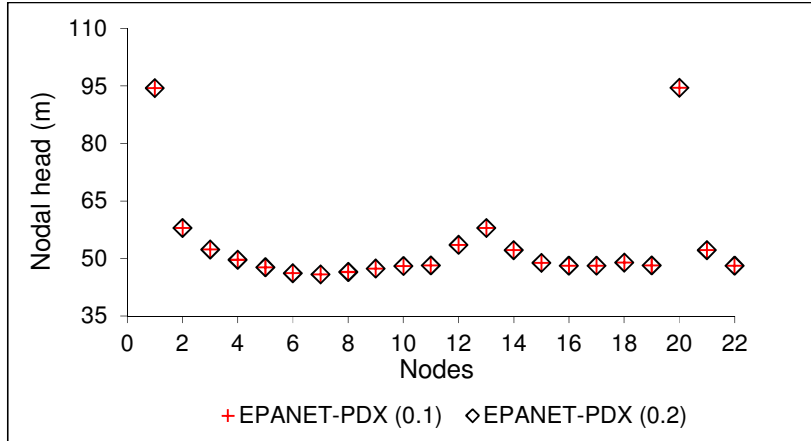

(a) Nodal heads in the network in Example 2

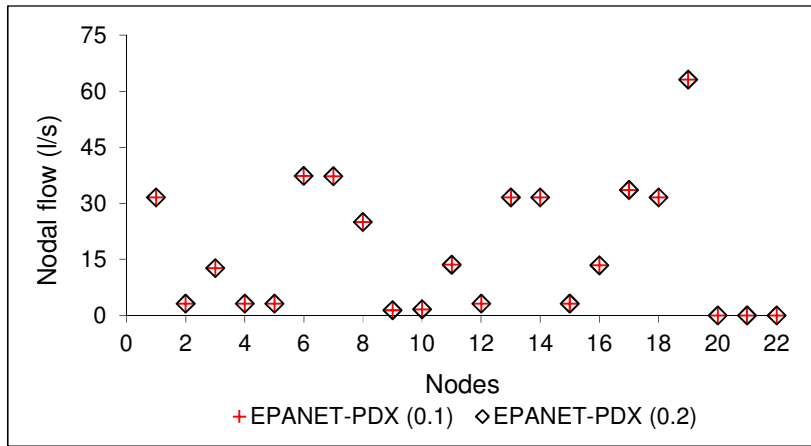

(b) Nodal flows in the network in Example 2

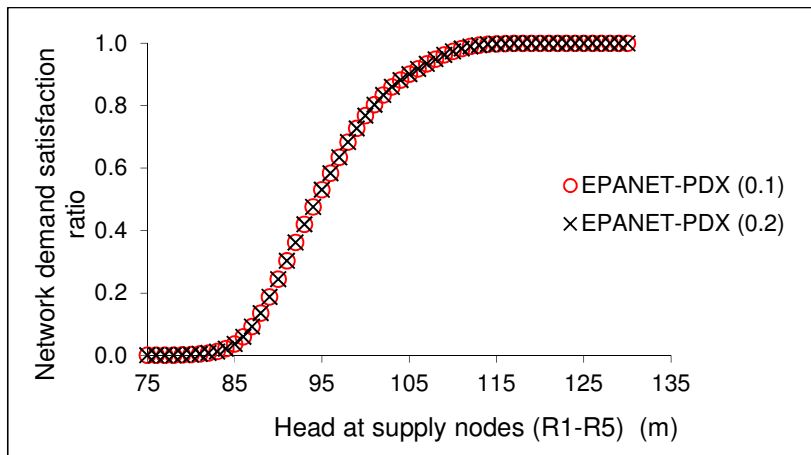

(c) Demand satisfaction as a function of pressure in the network in Example 3

**Fig. 6** Typical solutions for normal and pressure-deficient conditions

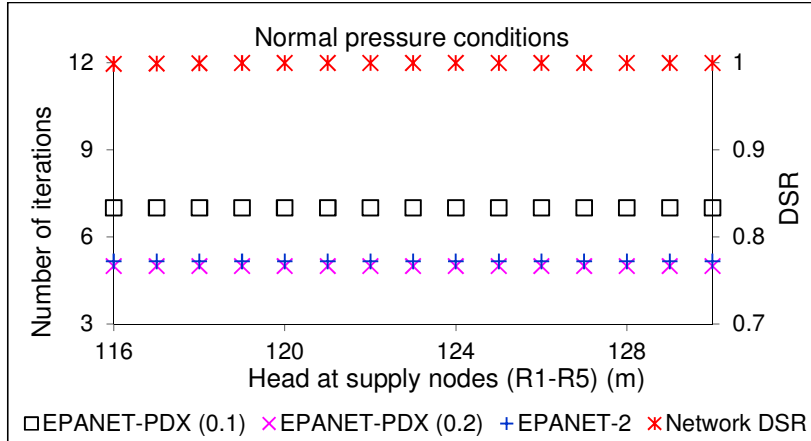

(a) Normal pressure conditions

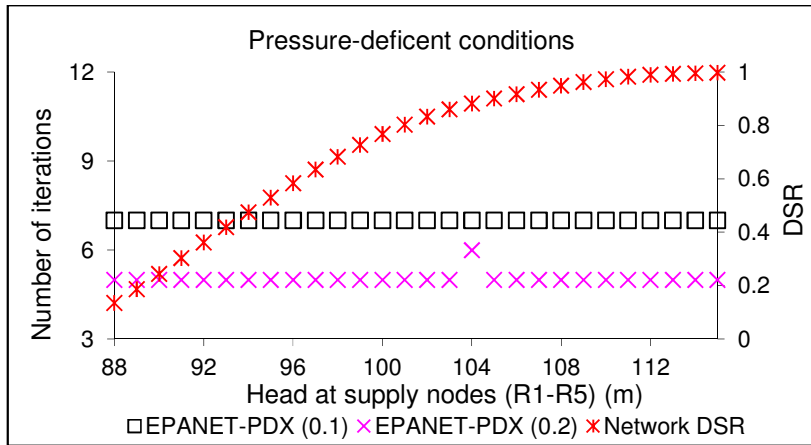

(b) Pressure-deficient conditions

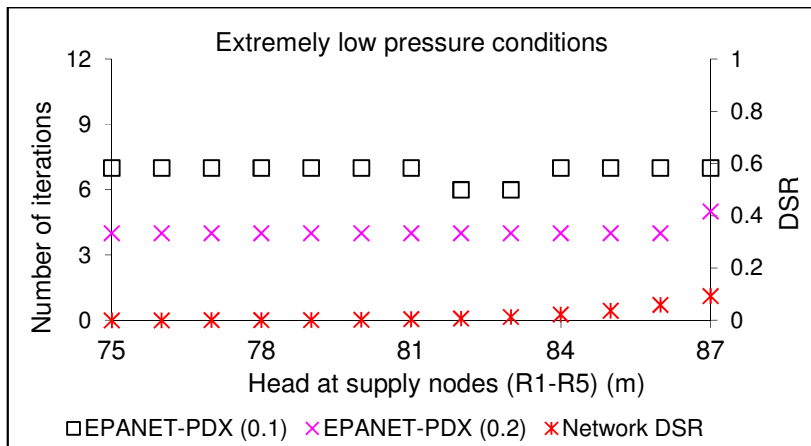

(c) Extremely low pressure conditions

**Fig. 7** Number of major iterations as a function of pressure in the network in Example 3
